# Supplementary material
Source: publisher figshare collection journal article supplement (https://acs.figshare.com/ndownloader/files/25566540)
Supplement: Supplementary file 1 [file 25566540]

# Supporting Information for

## Strain engineering to enhance the ORR performance of atomic-layer Pt on nanoporous gold

Jian Zhang, Shuai Yin, Hui-Ming Yin\*

Tianjin Key Laboratory of Advanced Functional Porous Materials, Institute for New Energy Materials & Low-Carbon Technologies, School of Materials Science and Engineering, Tianjin University of Technology, Tianjin 300384, China

\*Corresponding author: Hui-ming Yin (yinhui ming@tjut.edu.cn)

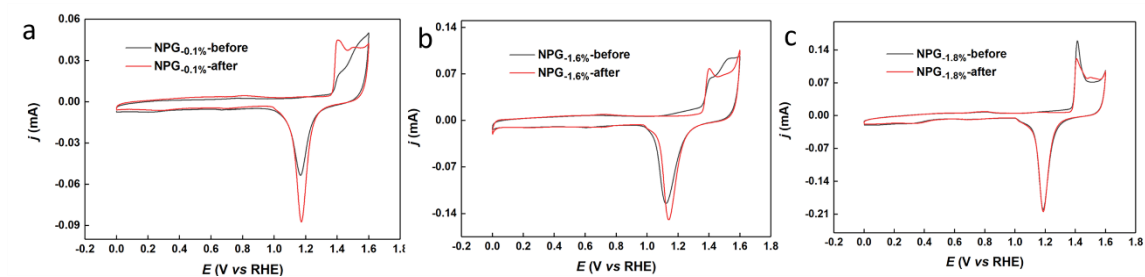

Figure S1. CV curves of the NPG substrates with different ligament sizes in Ar-saturated 0.5 M H<sub>2</sub>SO<sub>4</sub> before and after the potential cycling.

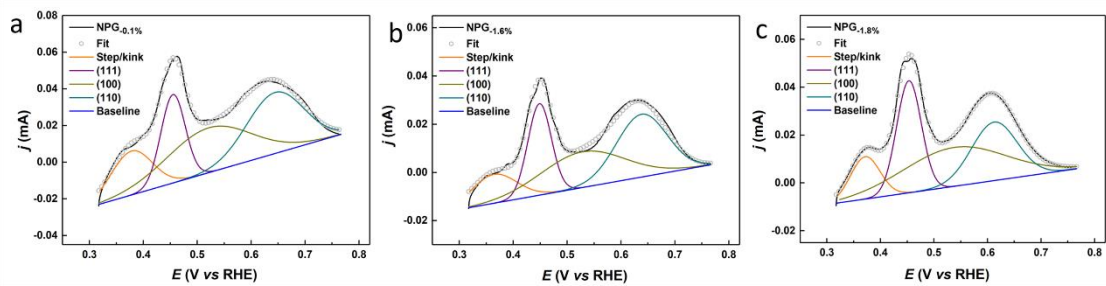

Figure S2. Desorption curves of the deposited Pb on the NPG substrates with different ligand sizes in Ar-saturated 0.5 M H<sub>2</sub>SO<sub>4</sub> after the potential cycling.

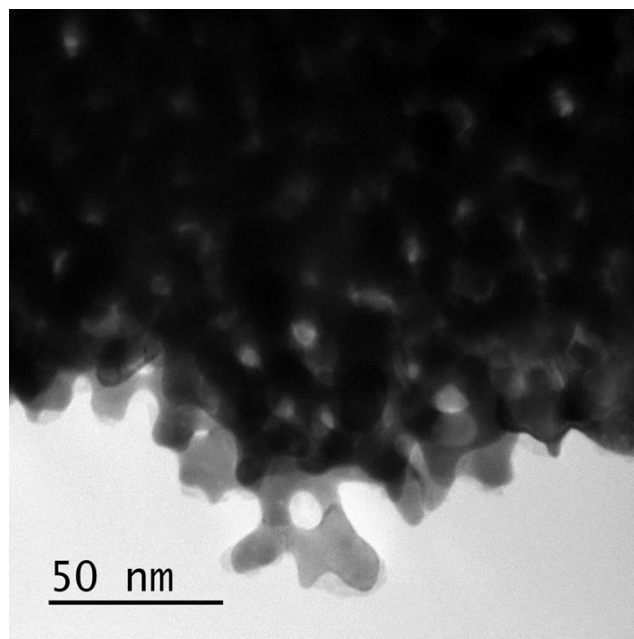

Figure S3. TEM image after 10k cycles ADT for NPG<sub>-1.8%</sub>-Pt.
